## Digital spatial profiling of coronary plaques from persons living with HIV reveals high levels of STING and CD163 in macrophage enriched regions

Celestine N. Wanjalla<sup>1,8</sup>, Liang Guo<sup>2</sup>, Daniela T. Fuller<sup>2</sup>, Mona Mashayekhi<sup>3</sup>, Samuel Bailin<sup>1</sup>, Curtis L. Gabriel<sup>4</sup>, Tecla Temu<sup>5</sup>, Jingjing Gong<sup>6</sup>, Yan Liang<sup>6</sup>, Renu Virmani<sup>2</sup>, Alope V. Finn<sup>2</sup>, Spyros A. Kalams<sup>1,9</sup>, Simon A. Mallal<sup>1,7,8</sup>, Jonathan J. Miner<sup>9</sup>, Joshua A. Beckman<sup>10</sup>, John R. Koethe<sup>1,8,12</sup>

<sup>1</sup> Division of Infectious Diseases, Vanderbilt University Medical Center, Nashville, TN, USA

<sup>2</sup> CVPPath Institute, Gaithersburg, MD, USA

<sup>3</sup> Division of Diabetes, Endocrinology and Metabolism, Vanderbilt University Medical Center, Nashville, TN, USA

<sup>4</sup> Division of Gastroenterology, Vanderbilt University Medical Center, Nashville, TN, USA

<sup>5</sup> Departments of Global Health, University of Washington, Seattle, WA, USA

<sup>6</sup> NanoString Technologies Inc, Seattle, WA, USA

<sup>7</sup> Vanderbilt Technologies for Advanced Genomics, Vanderbilt University Medical Center, Nashville, TN, USA

<sup>8</sup> Tennessee Center for AIDS Research, Vanderbilt University Medical Center, Nashville, TN, USA

<sup>9</sup> Washington University, Department of Medicine, Pathology and Immunology, and Molecular Microbiology, Division of Infectious Diseases, St. Louis, MS, USA

<sup>10</sup> Division of Cardiovascular Medicine, Vanderbilt University Medical Center, Nashville, TN, USA

<sup>11</sup> Veterans Affairs Tennessee Valley Healthcare System, Nashville, TN

† Corresponding authors: Celestine N. Wanjalla, MD, PhD; Division of Infectious Diseases, Vanderbilt University Medical Center, A-2200 MCN, 1161 21st Ave S., Nashville, TN, 37232-2582. (615) 322-2035 (o), (615) 343-6160 (f), [celestine.wanjalla@vumc.org](mailto:celestine.wanjalla@vumc.org).

## Graphical Abstract

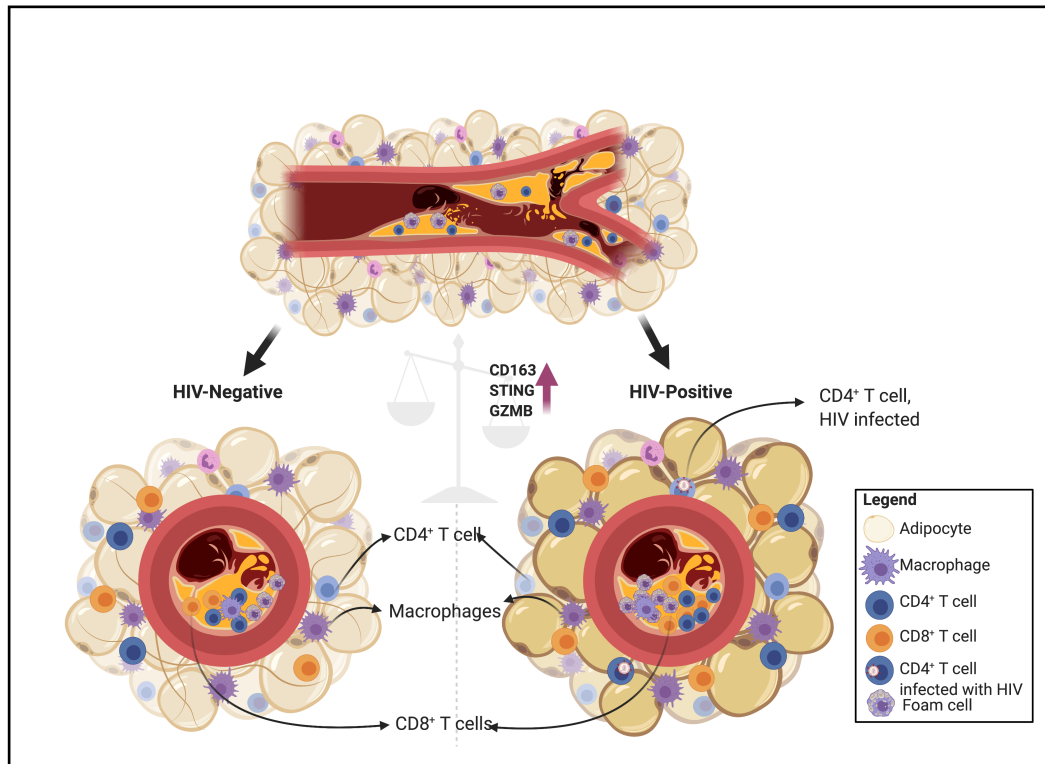

## Highlights

1. Immunohistochemical and fluorescent stains combined with GeoMx<sup>®</sup> digital spatial profiling allowed for deep characterization of immune cells within intact coronary plaques and perivascular adipose tissue
2. Coronary plaques from HIV-positive persons had higher proportion of CD163<sup>+</sup> immune cells compared to HIV-negative persons
3. Differential protein expression of immune-rich regions of interest within intact 5 $\mu$ m sections of coronary plaques revealed higher levels of stimulator of interferon gamma (STING) in HIV-positive persons

## **Abstract**

### **Background**

Chronic innate and adaptive immune activation may contribute to high prevalence of cardiovascular disease in persons living with HIV (PLWH).

### **Methods**

We assessed coronary plaques from deceased PLWH (n=6) and HIV-negative (n=6) persons matched by age and gender. Formalin-fixed, paraffin-embedded 5 $\mu$ m thick sections were processed using Movat, hematoxylin and eosin, immunohistochemical and immunofluorescence stains. Immune cell populations were measured using surface antibodies, and immune-related protein expression from macrophage rich, T-cell rich and perivascular adipose tissue regions using GeoMx<sup>®</sup> digital spatial profiling.

### **Results**

Coronary plaques from PLWH and HIV-negative persons had similar plaque area and percent stenosis. Percent CD163<sup>+</sup> cells as measured by immunohistochemical staining was significantly higher in PLWH, median 0.29% (IQR 0.11-0.90) vs. 0.01% (IQR 0.0013-0.11) in HIV-negative plaque,  $p = 0.02$  (Figure 1A). Other surface markers of innate cells (CD68<sup>+</sup>,  $p=0.18$ ), adaptive immune cells (CD3<sup>+</sup>,  $p=0.39$ ; CD4<sup>+</sup>,  $p=0.09$ ; CD8<sup>+</sup>,  $p=0.18$ ) and immune trafficking markers (CX3CR1<sup>+</sup>,  $p=0.09$ ) within the coronary plaque trended higher in HIV-positive plaques but did not reach statistical significance. GeoMx<sup>®</sup> digital spatial profiling showed higher differential protein expression of CD163 (scavenger receptor for hemoglobin-haptoglobin complex), stimulator of interferon gamma (STING, a cytosolic DNA sensor), CD25 and granzyme-B in the HIV-positive compared to HIV-negative,  $p<0.05$ (Figure 1B).

### **Conclusions**

Increased inflammation within the coronary plaques of PLWH is characterized by more innate and adaptive immune cells. Higher STING expression in PLWH suggests that immune response to viral antigens within the plaque might be a driver above other stimulants. STING inhibitors are available and could be investigated as a future therapeutic target in PWH if these results are replicated with a larger number of plaques.

**Key words:** Atherosclerosis, cardiovascular disease, HIV, stimulator of interferon gamma, CX3CR1, cytomegalovirus, inflammation

## 1 Introduction

2 Persons living with human immune deficiency virus (PLWH) have a greater prevalence of  
3 cardiovascular disease (CVD) compared to HIV-negative persons, which is not explained by  
4 differences in traditional risk factors and persists despite suppression of plasma viremia on  
5 antiretroviral therapy (ART).<sup>1-5</sup> Chronic inflammation due to HIV-infection and other viral  
6 pathogens such as cytomegalovirus (CMV) and hepatitis C virus, have been linked to  
7 accelerated atherosclerosis<sup>6,7</sup> and may in part explain this increased risk. Aortic and carotid  
8 artery inflammation measured by 18F-fluorodeoxyglucose positron emission tomography (FDG-  
9 PET) imaging,<sup>14,15</sup> showed greater tracer uptake in PLWH and was associated with higher  
10 plasma hsCRP, IL-6, CX3CR1<sup>+</sup> monocytes, and potentially CX3CR1<sup>+</sup> CD4<sup>+</sup> T cells.<sup>14</sup> In  
11 general, PLWH on ART have higher levels of inflammation compared to HIV-negative persons.<sup>8,</sup>  
12 <sup>9</sup> Higher levels of circulating interleukin-6 (IL-6), high sensitivity c-reactive protein (hsCRP) and  
13 d-dimer are associated with CVD events in PLWH<sup>10-12</sup>. Studies in 'elite controllers', or PLWH  
14 with low or undetectable plasma viremia in the absence of ART, notably also showed higher  
15 carotid intimal media thickness compared with HIV-negative controls after adjusting for  
16 traditional risk factors, indicating that antiretroviral agents or higher HIV replication per se was  
17 not the driver of vascular disease.<sup>13</sup>  
18  
19 Different circulating immune cell subsets have been associated with CVD in the general  
20 population and PLWH, though results have been conflicting. CD27<sup>-</sup> CD28<sup>-</sup> CD45RO<sup>+</sup> CD4<sup>+</sup> T  
21 cells, for example, were associated with increased mortality from coronary heart disease.<sup>16</sup> In  
22 contrast, a large analysis combining participants in the Multi-Ethnic Study of Atherosclerosis  
23 (MESA) and the Cardiovascular Health Study (CHS) found that circulating lymphocytes (CD4<sup>+</sup>,  
24 CD8<sup>+</sup>, CD19<sup>+</sup>) and monocytes (CD14<sup>+</sup>) were not associated with future myocardial infarction in  
25 otherwise healthy adults<sup>17</sup>. Among PLWH, lower CD4<sup>+</sup> T cell counts have been linked with  
26 higher rates of non-AIDS diseases, including CVD.<sup>18</sup> CD4<sup>+</sup> T cell counts less than 200

27 cells/mm<sup>3</sup> were also associated with greater arterial stiffness<sup>19</sup> and carotid plaque (IMT >  
28 1.5mm).<sup>20</sup> In other studies and in contrast, higher absolute CD4<sup>+</sup> T cell counts post-ART at the  
29 time of CVD assessment have also been associated with cardiovascular aging in PLWH.<sup>21</sup> A  
30 potential explanation of this paradox is the expansion of a subset of cytotoxic CMV-specific  
31 CD4<sup>+</sup> T cells in the presence of ART which are highly inflammatory and atherogenic. The  
32 majority of PLWH are co-infected with CMV and have inflated CD4<sup>+</sup> and CD8<sup>+</sup> T cells dedicated  
33 to controlling CMV replication.<sup>22, 23</sup> A higher percentage of CMV-specific CD8<sup>+</sup> T cells in PLWH  
34 is associated with increased carotid intima-media thickness,<sup>24</sup> while higher anti-CMV IgG titers  
35 are associated with subclinical carotid artery disease and increased mortality from coronary  
36 heart disease.<sup>16, 25</sup>

37  
38 Although inflammation is thought to play an important role in the development of an atheroma,  
39 and therapeutic targets including antiviral therapies or immune therapies have been proposed,  
40 to our knowledge there has been no research on the immune landscape of arterial plaques in  
41 persons with HIV. A comparison of plaques from PLWH vs. HIV-negative persons may delineate  
42 inflammatory pathways contributing to a higher burden of CVD. We previously described the C-  
43 G-C<sup>+</sup> CD4<sup>+</sup> T cells co-expressing CX3CR1 and CD57 in HIV-positive diabetics, and found that  
44 these cells are predominantly T<sub>EMRA</sub> cells and overlap with CD28<sup>-</sup> CD4<sup>+</sup> T cells that have been  
45 described in aging individuals<sup>26</sup>. Further, a recent publication using single cells isolated from  
46 carotid plaque samples of HIV-negative individuals, showed expression of CX3CL1 in nascent  
47 plaque and CX3CR1<sup>+</sup> CD57<sup>+</sup> CD4<sup>+</sup> T cells within the plaque by flow cytometry.<sup>27</sup> They did not  
48 include plaque from HIV-positive samples which we address in this study.

49  
50 Understanding the role of inflammation in atherosclerosis requires definitive evidence using in-  
51 depth analysis of immune cells within plaque tissue<sup>28</sup>. This has not been done in PLWH and  
52 until now, we were limited in our ability to investigate immune subsets within vulnerable human

53 plaque tissue due to high levels of necrosis that affected the integrity of surrounding tissue and  
54 immune cell yield<sup>29-33</sup>. In this paper, we investigated immune cells within coronary plaque tissue  
55 and surrounding adventitia using GeoMX<sup>®</sup> digital spatial profiling which allowed us to pick  
56 regions within the plaque and compare surface and intracellular protein expression. Plaques are  
57 heterogenous and understanding the immune drivers of atherogenesis is enhanced by the new  
58 technologies that allow us to select regions within the plaque for detailed analysis.

59  
60 As metabolic disease and CVD are co-travelers, we hypothesized that C-G-C CD4<sup>+</sup> T cells  
61 which express CX3CR1 could traffic to inflamed endothelium and contribute to CVD progression  
62 in PLWH. C-G-C CD4<sup>+</sup> T are cytotoxic and more commonly anti-viral. We obtained coronary  
63 plaques from twelve deceased individuals with (n=6) and without HIV (n=6) of similar age and  
64 sex distribution. The coronary plaques were staged and evaluated for immune cells using  
65 immunohistochemistry staining. We found that plaques from PLWH had higher proportions of  
66 immune cells per area, with significantly more CD163<sup>+</sup> cells. Most importantly, using GeoMX<sup>®</sup>  
67 digital spatial profiling, we found a significantly higher expression of stimulator of interferon  
68 gamma (STING), CD163, and several immune proteins consistent with a cytotoxic response in  
69 the HIV-positive coronary plaque.

70

## 71 **Methods and materials**

### 72 **Human samples**

73 This study used deidentified human coronary plaque samples/ autopsy specimens approved for  
74 exempt review by the institutional review boards of CVPath and Vanderbilt University Medical  
75 Center (IRB# 200148). Slides containing major epicardial coronary arteries sectioned at 3-4mm  
76 intervals from six HIV-positive and six HIV-negative persons who died of sudden cardiac death  
77 were obtained from the CVPath Institute (Gaithersburg, MD) (**Supplementary Table 1**). CVPath  
78 Institute maintains curated biorepository of coronary artery beds from over 7000 autopsy hearts

79 from the Office of the Chief Medical Examiner of the State of Maryland (OCME-MD) collected  
80 between 2005 and 2019, for providing cardiac consultation. Each heart is evaluated by a  
81 cardiac pathologist for staging and the cause of death, if known, is recorded along with de-  
82 identified demographic information including age, gender, and race. Each specimen is fixed in  
83 10% formalin and regions of interest are decalcified before processing. The arteries with  
84 coronary plaques are fixed and serial sections embedded in paraffin. Sections are cut at 5-6 $\mu$ m  
85 and mounted on charged slides<sup>35</sup>.

86

### 87 **Immunohistochemical staining**

88 FFPE sections were stained using Movat pentachrome and hematoxylin and eosin stains  
89 (H&E). We selected immune markers to define innate and adaptive Immune cells present in the  
90 plaques. These were identified by immunohistochemical staining (IHC) with antibodies against T  
91 cells: CD3 (Roche Cat # 790-4341, pre-diluted), CD4 (Roche, Cat# 790-4423, pre-diluted), CD8;  
92 macrophages: CD68 (Roche Cat# 790-2931, pre-diluted), CD163 (Leica Cat# NCL-L-CD163,  
93 antibody 1:50), vascular cell adhesion molecule 1 (VCAM-1) (Abcam ab134047, 1:500, diluted)  
94 and an endothelial homing chemokine receptor, CX3CR1 (Abcam ab8021, 1:1000 dilution),  
95 DISCOVERY OmniMap anti-Ms HRP cat # 760-4310 or anti-Rb HRP cat # 760-4311 and  
96 developed by the NovaRed kit (Vector Laboratories). The images were captured by Axio  
97 Scan.Z1 (Zeiss, Germany) using a 20X objective. IHC staining was quantified in segments with  
98 the most severe stenosis using the area quantification module on the HALO image analysis  
99 platform (Indica Labs, Corrales, NM) as previously published.<sup>35, 36</sup>

100

### 101 **Digital Spatial profiling of protein expression**

102 Expression of multiple immune-related proteins was measured on 5 $\mu$ m thickness formalin-fixed  
103 paraffin-embedded (FFPE) tissue sections from the coronary plaques of two male HIV-positive



104 and HIV-negative with the highest degree of immune cell infiltration. FFPE sections were treated  
105 with citrate buffer (pH6) for antigen retrieval. They were bathed in a multiplexed cocktail of  
106 primary antibodies with photocleavable DNA-indexing oligos (GeoMX<sup>®</sup> Immune profile core,  
107 Immune Cell typing, Immune Activation Status, IO Drug Target and Pan Tumor modules),  
108 fluorescent anti-CD3 (magenta, Cat.# UM500048 ), anti-CD8 (green, Cat.# 14-0008-82), anti-  
109 CD68 (yellow, Cat.# sc-20060) and SYTO 83 nuclear staining (Cat.# S11364). Fluorescence  
110 microscopy on the GeoMX<sup>®</sup> platform was used to image the slides. Twelve regions of  
111 interest/areas of interest (ROIs/AOIs) from each were processed using the NanoString's  
112 GeoMX<sup>®</sup> digital spatial profiling platform ([https://www.nanostring.com/scientific-](https://www.nanostring.com/scientific-content/technology-overview/digital-spatial-profiling-technology)  
113 [content/technology-overview/digital-spatial-profiling-technology](https://www.nanostring.com/scientific-content/technology-overview/digital-spatial-profiling-technology)). Images of stained sections  
114 were captured at 20X magnification. ROIs/AOIs for molecular profiling were selected as  
115 geometric shapes in macrophage-abundant, T-cell abundant and adipose tissue sections. Per  
116 protocol, protein staining was repeated twice to verify the results. AOIs were exposed to  
117 ultraviolet light (365nm) to release the indexed oligos/barcodes for collection. Oligos were  
118 captured from the AOI by microcapillaries and dispensed into 96-well plates. Following  
119 collections from all AOIs, the oligos (hybridized to unique four-color, six-spot optical indexing  
120 barcodes) were quantified on the nCounter analysis platform. Data were normalized to area;  
121 signal-to-noise ratios (SNR) were calculated using isotype controls. Proteins with SNR less than  
122 2 were not included in differential expression analysis. Data were visualized by unsupervised  
123 hierarchical clustering. Differential gene expression was analyzed by unpaired *t-test* with  
124 Benjamini Hochberg (BH) correction.

125

## 126 **Statistical analysis**

127 Differential expression of proteins in coronary plaques and correlation plots of protein  
128 expression were analyzed using *t-test* on the GeoMx<sup>®</sup> software platform with Benjamini  
129 Hochberg correction for multiple comparisons, where applicable. Statistical differences in

130 immune cells within coronary plaques of HIV-positive and HIV-negative persons were calculated  
131 using GraphPad Prism 8 and R v.3.6.1.

132

## 133 **Results**

### 134 **Demographics of HIV-negative and HIV-positive persons**

135 We obtained coronary plaques from six HIV-positive (median age 50) and six HIV-negative  
136 deceased persons (median age 52) (**Supplementary Table 1**). Half of each group was female.  
137 There were more Caucasians in the HIV-negative group (5/6) compared to the HIV-positive  
138 group (1/6). The coronary plaque lesions consisted of early and late atheroma (**Supplementary**  
139 **Table 1**). The cardiac death categories, as applicable, are also provided for reference in the  
140 table.

141

### 142 **Coronary plaque morphology and immune cell constituents in HIV-positive and HIV-** 143 **negative persons**

144 We first compared the coronary plaque histology between HIV-positive and HIV-negative  
145 persons. Movat and H&E stains were used to define the coronary plaque constituents; three  
146 representative images are shown (**Figure 1A**). There was no significant difference in plaque  
147 area (median  $4.74E^6 \mu\text{m}^2$  [ $2.78E^6 - 8.00E^6$ ] in HIV-negative vs.  $7.05 E^6 \mu\text{m}^2$  [ $5.59E^6 - 8.81E^6$ ] in  
148 HIV-positive,  $p=0.31$ ) or percent stenosis (median 66% [54 – 72] in HIV-negative vs. 50% [41 –  
149 62] in HIV-positive,  $p=0.13$ ) (**Figure 1B**). Using IHC, we quantified cells of the innate and  
150 adaptive immune system. CD68 is a surface marker expressed on monocytes and  
151 macrophages; CD3/CD4/CD8 are markers expressed on T cells and vascular cell adhesion  
152 molecule 1 (VCAM-1) and CX3CR1) are markers associated with trafficking to inflamed  
153 endothelium (**Figure 2A**). We found no difference in the percentage of CD68<sup>+</sup> cells between  
154 HIV-negative (median 0.38% per  $\mu\text{m}^2$  [0.13, 1.11]) and HIV-positive (1.58% [0.28, 2.94])

155 coronary plaques,  $p=0.18$ . Similarly, the percentage of T cells was not different between HIV-  
156 negative and HIV-positive coronary plaque: CD3 (median 0.07% per  $\mu\text{m}^2$  [0.03, 0.23] vs. 0.2%  
157 per  $\mu\text{m}^2$  [0.11, 0.34],  $p=0.39$ ); CD4 (median 0.001% per  $\mu\text{m}^2$  [0.0006, 0.05] vs. 0.1% per  $\mu\text{m}^2$   
158 [0.007, 0.26],  $p=0.09$ ) or CD8 T cells (median 0.05% per  $\mu\text{m}^2$  [0.004, 0.17] vs. 0.17% per  $\mu\text{m}^2$   
159 [0.08, 0.28],  $p=0.18$ ). Similar trends were seen in the markers associated with trafficking of cells  
160 to inflamed endothelium VCAM-1 (median 0.008% per  $\mu\text{m}^2$  [0.002, 0.03] vs. 0.05% per  $\mu\text{m}^2$   
161 [0.009, 0.2],  $p=0.24$ ) and CX3CR1 (median 0.1% per  $\mu\text{m}^2$  [0.08, 0.9] vs. 0.8% per  $\mu\text{m}^2$  [0.6,  
162 1.3],  $p=0.09$ ). In aggregate, there appeared to be a trend towards more immune cells in  
163 coronary plaques from HIV-positive individuals (**Figure 2B**). Similarly, we obtained high  
164 magnification images of perivascular adipose tissue adjacent to the coronary plaques that  
165 showed the presence of innate and adaptive immune cells (**Supplementary Figure 1**)

166  
167 Membrane bound CD163 is a scavenger receptor of hemoglobin-haptoglobin complexes that is  
168 expressed exclusively on macrophages<sup>37</sup>. This receptor in humans can be cleaved by the  
169 inflammation-inducible enzyme TNF- $\alpha$  converting enzyme (TACE) to generate soluble CD163  
170 that has been shown to be higher in the peripheral blood of PLWH.<sup>38</sup> Previous studies  
171 comparing sCD163 expression found higher levels in HIV+CMV+ compared to HIV+CMV-  
172 persons<sup>42</sup>. CD163<sup>+</sup> macrophages have been associated with a high level of HIF1 $\alpha$  expression  
173 and plaque progression due to increased plaque angiogenesis and plaque vulnerability. We  
174 found that CD163<sup>+</sup> cells were more prevalent in the HIV-positive (median 0.29% per  $\mu\text{m}^2$  [0.11,  
175 1.45]) versus HIV-negative (median 0.01% per  $\mu\text{m}^2$  [0.001, 0.11]),  $p = 0.02$ ) (**Figure 2**). Although  
176 vascular adhesion molecule-1 (VCAM-1<sup>+</sup>) was higher in HIV-positive (median 0.05% per  $\mu\text{m}^2$   
177 [0.009, 0.20]) versus HIV-negative (median 0.008% per  $\mu\text{m}^2$  [0.002, 0.03]),  $p = 0.24$ ), this  
178 difference was not statistically different in this small sample. Taken together, coronary plaque  
179 samples from HIV-positive and HIV-negative deceased persons had a median plaque area and

180 stenosis that was similar. However, there was a trend towards higher percentages of immune  
181 cells in HIV-positive samples, with significantly higher CD163<sup>+</sup> cells and a trend towards higher  
182 CX3CR1<sup>+</sup> cells.

183

### 184 **Innate and adaptive immune cells did not correlate with plaque stenosis in HIV-positive** 185 **samples**

186 Immune cell enrichment in coronary plaques is non-stochastic and is a harbinger of  
187 atherosclerosis progression. Monocytes are recruited early after endothelial injury and are  
188 stimulated to become macrophages in the sub-endothelium. Using correlation matrices, we  
189 looked to see if there were relationships between plaque area, plaque stenosis and plaque  
190 resident immune subsets. Spearman's rank correlation analysis agnostic to HIV-status, showed  
191 that CD68<sup>+</sup> cells were positively correlated with CD163<sup>+</sup> ( $\rho=0.79$ ,  $p<0.01$ ), CD3<sup>+</sup> ( $\rho=0.69$ ,  
192  $p<0.05$ ), CD4<sup>+</sup> ( $\rho=0.74$ ,  $p < 0.01$ ), and CX3CR1<sup>+</sup> ( $\rho = 0.71$ ,  $p < 0.05$ ) cells. CD8<sup>+</sup> ( $\rho =$   
193  $0.52$ ,  $p = 0.09$ ) and VCAM-1<sup>+</sup> ( $\rho = 0.42$ ,  $p = 0.18$ ) were not significant (**Figure 3A**). We  
194 observed that CX3CR1<sup>+</sup> cells were positively correlated with CD163<sup>+</sup> ( $r=0.88$ ,  $p < 0.001$ ), CD3<sup>+</sup>  
195 ( $r=0.80$ ,  $p < 0.01$ ), CD4<sup>+</sup> ( $r=0.76$ ,  $p < 0.01$ ), CD8<sup>+</sup> ( $r= 0.80$ ,  $p < 0.01$ ), and VCAM-1 ( $r=0.67$ ,  $p <$   
196  $0.05$ ) (**Figure 3A**). When we stratified samples by HIV-status, percent stenosis was positively  
197 correlated with CD163<sup>+</sup>, CD3<sup>+</sup>, CD4<sup>+</sup>, and CD8<sup>+</sup> cells in HIV-negative (**Figure 3B,D**). On the  
198 contrary, percent stenosis was not correlated with all immune subsets in HIV-positive individuals  
199 (**Figure 3C,D**).

200

### 201 **Coronary plaque heterogeneity in HIV-positive and HIV-negative persons**

202 Coronary plaque FFPE sections from two individuals (one HIV-positive and one HIV-negative)  
203 were selected and matched on age, morphology, sex and percent of immune cells as seen by  
204 IHC (CD68<sup>+</sup> cells, 2.7% HIV-positive and 2.3% in HIV-negative; CX3CR1<sup>+</sup>, 1.4% HIV-positive  
205 and 2.0% in HIV-negative). CD163 and VCAM-1 positivity was higher in the HIV-positive

206 samples (IHC stains) compared to the HIV-negative samples (**Supplementary Table 2**).

207 Representative sections from each of these individuals were stained with fluorescently tagged

208 antibodies (CD3, CD8, CD68 and DAPI) and sequential areas of interest (AOI) from each

209 individual was selected (**Figure 4A**). Twelve regions were selected per sample representing

210 regions within the plaque, adventitia, and perivascular adipose tissue (**Figure 4B**). There was

211 significant heterogeneity in areas within the plaque as some regions had predominantly

212 macrophages and others had predominantly CD3<sup>+</sup>/CD8<sup>+</sup> cells (**Figure 4C**). Images with single

213 fluorescent antibodies were included to show the macrophage and T cells within each AOI

214 (**Supplementary Figure 2**). In general, there was similar degree of heterogeneity in the HIV-

215 positive and HIV-negative plaques.

216 Using an optical barcode microscope, we obtained digital spatial protein expression data from

217 the coronary plaques of an HIV-positive and HIV-negative person. Molecular profiling using a

218 heatmap showed that adipose tissue AOIs had similar protein expression profiles independent

219 of HIV-status (**Figure 5A**). Differential protein expression of all AOIs by HIV-status showed

220 higher Stimulator of interferon genes (STING), CD163, V-domain immunoglobulin suppressor of

221 T cell activation (VISTA), Bcl-2, Ki-67 and cytotoxic T-lymphocyte-associated protein 4 (CTLA-4)

222 ( $p < 0.05$ ) in the HIV-positive coronary plaque (**Figure 5B-C**).

223

#### 224 **STING is highly expressed in macrophage-rich HIV-positive AOIs**

225 We excluded the adipose tissue and adventitia (external AOIs) and analyzed the differential

226 protein expression of AOIs within the coronary plaque by HIV-status. These included 6 AOIs

227 from the HIV-positive plaque and 7 AOIs from the HIV-negative. Differential protein expression

228 by *t-test* showed significantly higher expression of STING, CD163, VISTA, GZMB, Ki-67, Bcl-2,

229 CD25, Tim-3, CD127 and CTLA4 in the HIV-positive coronary plaque AOIs (**Figure 6A**), while

230 HLA-DR, CD14 was higher in the HIV-negative coronary plaque. The distribution of the different

231 AOIs contributing to these main genes are shown by boxplot (**Figure 6B**). Due to the

232 heterogeneity within the coronary plaques, we used the trend line to show variations in counts  
233 by section in both the HIV-positive and negative. CD163 was highly expressed in all AOIs  
234 (**Figure 6C**). However, the segments that had the highest proportion of macrophages in the  
235 HIV-positive sample (AOI 9 and 10) had the highest expression of STING. Notably although  
236 lower expression of STING was present in the HIV-negative plaque, the regions with the highest  
237 expression were also those with more macrophages (AOI 1,2 and 6). STING correlated with  
238 activation (CD25,  $R^2 = 0.77$ ; Tim-3,  $R^2 = 0.83$ ), naïve and memory T cells (CD127,  $R^2 = 0.68$ ),  
239 macrophages (CD163,  $R^2 = 0.62$ ). VISTA protein, which is associated with myeloid activation  
240 and is a checkpoint inhibitor, expression was correlated with CD163  $R^2 = 0.82$  and GZMB  $R^2 =$   
241 0.71 (**Figure 6C**).

242  
243 Analysis of segments external to the plaque (adipose and adventitia) showed higher levels of  
244 B7-H3, fibronectin and CD34 expression in HIV-negative AOIs. Heatmap of external segments  
245 alone showed similarity in protein levels that clustered based on adipose tissue versus  
246 adventitia (**Figure 7A**). Differential protein levels by *t-test* showed higher B7-H3, CD34 and  
247 fibronectin in HIV-negative samples (**Figure 7B**). These proteins were highly prevalent in the  
248 adipose tissue segments (AOI 3,7,10 and 12) and not the immune T cell rich segment in the  
249 adventitia (AOI 5). CTLA4, STING and VISTA were found in high levels in immune cell rich AOIs  
250 in the adventitia (AOI 5 and 11) while CD163 was higher in an adipose AOI (4) and adventitia  
251 AOI with macrophages and T cells (6) (**Figure 7C**).

252  
253 CMV seroprevalence is significantly higher in PWH compared to HIV-negative individuals.<sup>50</sup> It  
254 has been proposed that PWH have a higher level of viral replication within tissue compartments  
255 even in the absence of active viremia. Although DNA viruses are the main stimulators of STING  
256 via cGAS, RNA viruses such as HIV may also stimulate STING via the retinoic acid-inducible  
257 gene I (RIG-I) pathways.<sup>51</sup> RIG-I is a cytosolic pattern recognition receptor that recognizes

258 double stranded viral RNA. Our proposed hypothesis is that viral DNA and RNA in PLWH,  
259 possibly in combination with modified oxidized peptides are transiently activating STING-related  
260 pathways within coronary plaques of PLWH, leading to higher levels of inflammation and  
261 increased plaque instability (**Figure 8**).

262

## 263 **DISCUSSION**

264 In this study, we hypothesized that coronary plaques from persons with HIV would have a  
265 higher proportion of immune cells compared to HIV-negative. Furthermore, they would have an  
266 immune profile that is consistent with stimulation by virus compared to coronary plaques from  
267 HIV-negative individuals. Newer single-cell analysis has facilitated the investigation of the  
268 heterogenous populations of cells present in atherosclerotic plaques.<sup>30</sup> Understanding the  
269 immune components is fundamental if we expect to develop immunotherapies that significantly  
270 reduce atherosclerosis progression and CV events. Using GeoMX<sup>®</sup> digital profiling, we were  
271 able to select regions that were enriched with macrophages, T cells, a combination  
272 (macrophages and T cells) or perivascular adipose tissue. In general, the coronary plaque AOIs  
273 from the representative HIV-positive plaque had higher expression of STING compared to the  
274 HIV-negative plaque AOIs. This was even more pronounced in the AOIs that were macrophage  
275 rich.

276

277 Using coronary samples from HIV-positive and HIV-negative individuals, we quantified the  
278 innate and adaptive immune cells within the coronary plaques and perivascular fat. We found a  
279 higher frequency of total immune cells within coronary plaques of HIV-positive persons. CD163<sup>+</sup>  
280 cells were significantly higher by IHC and protein expression using GeoMX<sup>®</sup> digital profiling.  
281 Notably, CD163 expression on monocytes and macrophages has been shown to confer  
282 susceptibility of infection with both DNA<sup>39</sup> and RNA<sup>40</sup> viruses. There are no studies to date that  
283 have looked at whether CD163<sup>+</sup> macrophages are more permissive to CMV infection. HIV

284 infected CD163<sup>+</sup> CD68<sup>+</sup> macrophages have been reported in gut biopsies from untreated PLWH  
285 while CMV was primarily detected in epithelial cells<sup>41</sup>. Ongoing studies using RNAscope will  
286 define the viral burden - HIV and CMV - within plaque tissue and in perivascular adipose tissue  
287 of PLWH to better understand the tissue pathology of these viruses in this context.

288

289 STING is an endoplasmic reticulum adaptor protein that can bind DNA viruses and intermediate  
290 DNA transcripts of RNA viruses initiating an innate immune inflammatory cascade leading to  
291 activate of type I interferons.<sup>52, 53</sup> The DNA viruses include CMV, Epstein Barr virus (EBV) and  
292 herpes simplex virus (HSV). STING is a critical signaling molecule that is involved in tissue  
293 inflammation and has been shown to trigger metabolic stress-induced endothelial inflammation  
294 in a mouse model. STING agonists have been shown to activate cells that were latently infected  
295 with simian immunodeficiency virus (SIV) and enhanced SIV-specific responses *in vivo*<sup>54</sup>. It is  
296 possible that a similar effect would be seen with HIV. Thus, in individuals co-infected with HIV  
297 and CMV, re-activation of CMV might create a setting where HIV infection is enhanced with  
298 apoptosis of those CD4<sup>+</sup> T cells. Notably, CMV-specific CD4<sup>+</sup> T cells express CX3CR1, and a  
299 subset of these CMV-specific cells are protected from HIV-infection<sup>55</sup>. As a result, the CMV-  
300 specific cells are likely to accumulate with time in the setting of low levels of CMV replication in  
301 tissues. We have previously shown that CMV-specific CD4<sup>+</sup> T cells were largely T effector  
302 memory cells RA<sup>+</sup> revertant (T<sub>EMRA</sub>) and T effector memory cells (T<sub>EM</sub>); cytotoxic with notable  
303 expression of GZMB and perforin at baseline.<sup>22</sup> To our knowledge, the role of STING in  
304 atherosclerosis has not been reported by other groups. Our next steps are to perform a similar  
305 analysis on a larger number of samples and define the pathogen burden (both viral and  
306 bacterial) within coronary plaques of PLWH and HIV-negative. This will involve *in situ* staining  
307 as well as droplet digital PCR to quantify DNA extracted from these samples. Identification of  
308 replicating virus in the plaque can provide evidence for the need of CMV-specific antivirals in  
309 this patient population or targeted inhibitors of the STING pathway.



310

311 This study has several limitations. The deceased persons were confirmed HIV-positive and HIV-  
312 negative. However, we do not have information on their ART regimens or viral load at the time  
313 of death. Therefore, if we find virus in their coronary plaques, we will not be able to relate the  
314 viral burden to their ART compliance. Furthermore, the samples are processed after  
315 examination by the medical examiner, therefore there could be a slight delay from when the  
316 patient died. Future studies using samples from living donors that are processed within 30  
317 minutes to 1 hour of obtaining the sample are underway. Finally, for the digital spatial profiling,  
318 we chose the individuals with the highest proportion of cells so that they would be comparable.  
319 Some sections of the HIV-negative blood vessel had the appearance of a total chronic  
320 occlusion. Based on our pathology analysis, we opted to match them based on the abundance  
321 of immune cells. Future studies will include a larger number of participants and different stages  
322 of atherosclerosis.

323

#### 324 **Conflict of interest**

325 The authors have declared that no conflict of interest exists.

326

#### 327 **Financial support**

328 This work was funded by NIH grants K23 100700 (JK), R01 DK112262 (JK and CW), HL131977  
329 (JB), R56 DK108352 (JK), the Vanderbilt Clinical and Translational Science award from  
330 NCRR/NIH grant UL1 RR024975, the Vanderbilt Infection Pathogenesis and Epidemiology  
331 Research Training Program (VIPER) grant T32 AI007474, CTSA award no. KL2 TR002245 from  
332 the National Center for Advancing Translational Sciences, and the Tennessee Center for AIDS  
333 Research grant P30 AI110527. The funding authorities had no role in study design; data  
334 collection, analysis, or interpretation; decision to publish; or preparation of the manuscript.

335

336 **Author contributions**

337 Conceptualization, C.N.W., L.G., J.R.K., J.B., S.A.M.; Methodology, C.N.W., L.G., D.T.F., L.M.,  
338 M.J.T., R.V., Y.L., J.G., A.V.F., S.B., C.L.G., M.M., S.A.M., J.B., J.R.K.; Statistics, C.N.W., J.G.,  
339 L.M., J.R.K.; Formal Analysis, C.N.W., L.G., D.T.F., L.M., S.B., M.J.T., J.R.K. ; Investigation,  
340 C.N.W., C.M.W., J.R. K; Resources, J.R.K., J.B., M.J.T., A.V.F., R.V., S.A.K., S.A.M.; Data  
341 Curation, C.N.W., L.G., D.T.F., L.M., M.J.T., J. R. K.; Writing – Original Draft, C.N.W., L.G.,  
342 J.R.K.; Writing – Review & Editing, all authors; Visualization, C.N.W., L.G., D.T.M., M.J.T.,  
343 J.R.K.; Supervision, J.R.K., L.G., R.V., A.V.F., M.J.T., S.A.M., S.A.K.; Project Administration,  
344 J.R.K., J. B., S.A.K.; Funding Acquisition, C.N.W., A.V.F., M.J.T., J.R.K.

## Bibliography

1. Shah ASV, Stelzle D, Lee KK, Beck EJ, Alam S, Clifford S, Longenecker CT, Strachan F, Bagchi S, Whiteley W, Rajagopalan S, Kottlilil S, Nair H, Newby DE, McAllister DA, Mills NL. Global burden of atherosclerotic cardiovascular disease in people living with hiv. *Circulation*. 2018;138:1100-1112
2. Currier JS, Taylor A, Boyd F, Dezii CM, Kawabata H, Burtcel B, Maa JF, Hodder S. Coronary heart disease in hiv-infected individuals. *J Acquir Immune Defic Syndr*. 2003;33:506-512
3. Triant VA, Lee H, Hadigan C, Grinspoon SK. Increased acute myocardial infarction rates and cardiovascular risk factors among patients with human immunodeficiency virus disease. *J Clin Endocrinol Metab*. 2007;92:2506-2512
4. Hsue PY, Deeks SG, Hunt PW. Immunologic basis of cardiovascular disease in hiv-infected adults. *J Infect Dis*. 2012;205 Suppl 3:S375-382
5. Freiberg MS, Chang CC, Kuller LH, Skanderson M, Lowy E, Kraemer KL, Butt AA, Bidwell Goetz M, Leaf D, Oursler KA, Rimland D, Rodriguez Barradas M, Brown S, Gibert C, McGinnis K, Crothers K, Sico J, Crane H, Warner A, Gottlieb S, Gottdiener J, Tracy RP, Budoff M, Watson C, Armah KA, Doeblner D, Bryant K, Justice AC. Hiv infection and the risk of acute myocardial infarction. *JAMA Intern Med*. 2013;173:614-622
6. El-Sadr WM, Lundgren J, Neaton JD, Gordin F, Abrams D, Arduino RC, Babiker A, Burman W, Clumeck N, Cohen CJ, Cohn D, Cooper D, Darbyshire J, Emery S, Fätkenheuer G, Gazzard B, Grund B, Hoy J, Klingman K, Losso M, Markowitz N, Neuhaus J, Phillips A, Rappoport C, Group SfMoATSS. Cd4+ count-guided interruption of antiretroviral treatment. *N Engl J Med*. 2006;355:2283-2296
7. Pothineni NVK, Subramany S, Kuriakose K, Shirazi LF, Romeo F, Shah PK, Mehta JL. Infections, atherosclerosis, and coronary heart disease. *Eur Heart J*. 2017;38:3195-3201
8. Armah KA, McGinnis K, Baker J, Gibert C, Butt AA, Bryant KJ, Goetz M, Tracy R, Oursler KK, Rimland D, Crothers K, Rodriguez-Barradas M, Crystal S, Gordon A, Kraemer K, Brown S, Gerschenson M, Leaf DA, Deeks SG, Rinaldo C, Kuller LH, Justice A, Freiberg M. Hiv status, burden of comorbid disease, and biomarkers of inflammation, altered coagulation, and monocyte activation. *Clin Infect Dis*. 2012;55:126-136
9. Hunt PW, Brenchley J, Sinclair E, McCune JM, Roland M, Page-Shafer K, Hsue P, Emu B, Krone M, Lampiris H, Douek D, Martin JN, Deeks SG. Relationship between t cell activation and cd4+ t cell count in hiv-seropositive individuals with undetectable plasma hiv rna levels in the absence of therapy. *J Infect Dis*. 2008;197:126-133
10. Duprez DA, Neuhaus J, Kuller LH, Tracy R, Bellosso W, De Wit S, Drummond F, Lane HC, Ledergerber B, Lundgren J, Nixon D, Paton NI, Prineas RJ, Neaton JD, Group ISS. Inflammation, coagulation and cardiovascular disease in hiv-infected individuals. *PLoS One*. 2012;7:e44454
11. De Luca A, de Gaetano Donati K, Colafigli M, Cozzi-Lepri A, De Curtis A, Gori A, Sighinolfi L, Giacometti A, Capobianchi MR, D'Avino A, Iacoviello L, Cauda R, D'Arminio Monforte A. The association of high-sensitivity c-reactive protein and other biomarkers with cardiovascular disease in patients treated for hiv: A nested case-control study. *BMC Infect Dis*. 2013;13:414

12. Triant VA, Meigs JB, Grinspoon SK. Association of c-reactive protein and hiv infection with acute myocardial infarction. *J Acquir Immune Defic Syndr*. 2009;51:268-273
13. Hsue PY, Hunt PW, Schnell A, Kalapus SC, Hoh R, Ganz P, Martin JN, Deeks SG. Role of viral replication, antiretroviral therapy, and immunodeficiency in hiv-associated atherosclerosis. *AIDS*. 2009;23:1059-1067
14. Tawakol A, Ishai A, Li D, Takx RA, Hur S, Kaiser Y, Pampaloni M, Rupert A, Hsu D, Sereti I, Fromentin R, Chomont N, Ganz P, Deeks SG, Hsue PY. Association of arterial and lymph node inflammation with distinct inflammatory pathways in human immunodeficiency virus infection. *JAMA Cardiol*. 2017;2:163-171
15. Yarasheski KE, Laciny E, Overton ET, Reeds DN, Harrod M, Baldwin S, Dávila-Román VG. 18fdg pet-ct imaging detects arterial inflammation and early atherosclerosis in hiv-infected adults with cardiovascular disease risk factors. *J Inflamm (Lond)*. 2012;9:26
16. Spyridopoulos I, Martin-Ruiz C, Hilkens C, Yadegarfar ME, Isaacs J, Jagger C, Kirkwood T, von Zglinicki T. Cmv seropositivity and t-cell senescence predict increased cardiovascular mortality in octogenarians: Results from the newcastle 85+ study. *Aging Cell*. 2016;15:389-392
17. Olson NC, Sitlani CM, Doyle MF, Huber SA, Landay AL, Tracy RP, Psaty BM, Delaney JA. Innate and adaptive immune cell subsets as risk factors for coronary heart disease in two population-based cohorts. *Atherosclerosis*. 2020;300:47-53
18. Baker JV, Peng G, Rapkin J, Abrams DI, Silverberg MJ, MacArthur RD, Cavert WP, Henry WK, Neaton JD, (CPCRA) TBCPfcRoA. Cd4+ count and risk of non-aids diseases following initial treatment for hiv infection. *AIDS*. 2008;22:841-848
19. Ho JE, Deeks SG, Hecht FM, Xie Y, Schnell A, Martin JN, Ganz P, Hsue PY. Initiation of antiretroviral therapy at higher nadir cd4+ t-cell counts is associated with reduced arterial stiffness in hiv-infected individuals. *AIDS*. 2010;24:1897-1905
20. Hsue PY, Lo JC, Franklin A, Bolger AF, Martin JN, Deeks SG, Waters DD. Progression of atherosclerosis as assessed by carotid intima-media thickness in patients with hiv infection. *Circulation*. 2004;109:1603-1608
21. Medina S, Wessman D, Krause D, Stepenosky J, Boswell G, Crum-Cianflone N. Coronary aging in hiv-infected patients. *Clin Infect Dis*. 2010;51:990-993
22. Abana CO, Pilkinton MA, Gaudieri S, Chopra A, McDonnell WJ, Wanjalla C, Barnett L, Gangula R, Hager C, Jung DK, Engelhardt BG, Jagasia MH, Klenerman P, Phillips EJ, Koelle DM, Kalams SA, Mallal SA. Cytomegalovirus (cmv) epitope-specific cd4(+) t cells are inflated in hiv(+) cmv(+) subjects. *J Immunol*. 2017;199:3187-3201
23. Hunt PW, Martin JN, Sinclair E, Epling L, Teague J, Jacobson MA, Tracy RP, Corey L, Deeks SG. Valganciclovir reduces t cell activation in hiv-infected individuals with incomplete cd4+ t cell recovery on antiretroviral therapy. *J Infect Dis*. 2011;203:1474-1483
24. Hsue PY, Hunt PW, Sinclair E, Brecht B, Franklin A, Killian M, Hoh R, Martin JN, McCune JM, Waters DD, Deeks SG. Increased carotid intima-media thickness in hiv patients is associated with increased cytomegalovirus-specific t-cell responses. *AIDS*. 2006;20:2275-2283
25. Parrinello CM, Sinclair E, Landay AL, Lurain N, Sharrett AR, Gange SJ, Xue X, Hunt PW, Deeks SG, Hodis HN, Kaplan RC. Cytomegalovirus immunoglobulin g antibody is

- associated with subclinical carotid artery disease among hiv-infected women. *J Infect Dis.* 2012;205:1788-1796
26. Koch S, Larbi A, Derhovanessian E, Ozcelik D, Naumova E, Pawelec G. Multiparameter flow cytometric analysis of cd4 and cd8 t cell subsets in young and old people. *Immun Ageing.* 2008;5:6
  27. Chen B, Morris SR, Panigrahi S, Michaelson GM, Wyrick JM, Komissarov AA, Potashnikova D, Lebedeva A, Younes SA, Harth K, Kashyap VS, Vasilieva E, Margolis L, Zidar DA, Sieg SF, Shive CL, Funderburg NT, Gianella S, Lederman MM, Freeman ML. Cytomegalovirus coinfection is associated with increased vascular-homing cd57. *J Immunol.* 2020
  28. Libby P, Ridker PM, Hansson GK. Progress and challenges in translating the biology of atherosclerosis. *Nature.* 2011;473:317-325
  29. Cochain C, Vafadarnejad E, Arampatzis P, Pelisek J, Winkels H, Ley K, Wolf D, Saliba AE, Zerneck A. Single-cell rna-seq reveals the transcriptional landscape and heterogeneity of aortic macrophages in murine atherosclerosis. *Circ Res.* 2018;122:1661-1674
  30. Fernandez DM, Rahman AH, Fernandez NF, Chudnovskiy A, Amir ED, Amadori L, Khan NS, Wong CK, Shamailova R, Hill CA, Wang Z, Remark R, Li JR, Pina C, Faries C, Awad AJ, Moss N, Bjorkegren JLM, Kim-Schulze S, Gnjatic S, Ma'ayan A, Mocco J, Faries P, Merad M, Giannarelli C. Single-cell immune landscape of human atherosclerotic plaques. *Nat Med.* 2019;25:1576-1588
  31. Lebedeva A, Vorobyeva D, Vagida M, Ivanova O, Felker E, Fitzgerald W, Danilova N, Gontarenko V, Shpektor A, Vasilieva E, Margolis L. Ex vivo culture of human atherosclerotic plaques: A model to study immune cells in atherogenesis. *Atherosclerosis.* 2017;267:90-98
  32. Zhou X, Stemme S, Hansson GK. Evidence for a local immune response in atherosclerosis. Cd4+ t cells infiltrate lesions of apolipoprotein-e-deficient mice. *Am J Pathol.* 1996;149:359-366
  33. Mach F, Sauty A, Iarossi AS, Sukhova GK, Neote K, Libby P, Luster AD. Differential expression of three t lymphocyte-activating cxc chemokines by human atheroma-associated cells. *J Clin Invest.* 1999;104:1041-1050
  34. Wanjalla CN, McDonnell WJ, Barnett L, Simmons JD, Furch BD, Lima MC, Woodward BO, Fan R, Fei Y, Baker PG, Ram R, Pilkinton MA, Mashayekhi M, Brown NJ, Mallal SA, Kalams SA, Koethe JR. Adipose tissue in persons with hiv is enriched for cd4. *Front Immunol.* 2019;10:408
  35. Kramer MC, Rittersma SZ, de Winter RJ, Ladich ER, Fowler DR, Liang YH, Kutys R, Carter-Monroe N, Kolodgie FD, van der Wal AC, Virmani R. Relationship of thrombus healing to underlying plaque morphology in sudden coronary death. *J Am Coll Cardiol.* 2010;55:122-132
  36. Guo L, Akahori H, Harari E, Smith SL, Polavarapu R, Karmali V, Otsuka F, Gannon RL, Braumann RE, Dickinson MH, Gupta A, Jenkins AL, Lipinski MJ, Kim J, Chhour P, de Vries PS, Jinnouchi H, Kutys R, Mori H, Kutyna MD, Torii S, Sakamoto A, Choi CU, Cheng Q, Grove ML, Sawan MA, Zhang Y, Cao Y, Kolodgie FD, Cormode DP, Arking DE, Boerwinkle E, Morrison AC, Erdmann J, Sotoodehnia N, Virmani R, Finn AV. Cd163+ macrophages

- promote angiogenesis and vascular permeability accompanied by inflammation in atherosclerosis. *J Clin Invest*. 2018;128:1106-1124
37. Kristiansen M, Graversen JH, Jacobsen C, Sonne O, Hoffman HJ, Law SK, Moestrup SK. Identification of the haemoglobin scavenger receptor. *Nature*. 2001;409:198-201
  38. Burdo TH, Lo J, Abbara S, Wei J, DeLelys ME, Preffer F, Rosenberg ES, Williams KC, Grinspoon S. Soluble cd163, a novel marker of activated macrophages, is elevated and associated with noncalcified coronary plaque in hiv-infected patients. *J Infect Dis*. 2011;204:1227-1236
  39. Sánchez-Torres C, Gómez-Puertas P, Gómez-del-Moral M, Alonso F, Escribano JM, Ezquerro A, Domínguez J. Expression of porcine cd163 on monocytes/macrophages correlates with permissiveness to african swine fever infection. *Arch Virol*. 2003;148:2307-2323
  40. Calvert JG, Slade DE, Shields SL, Jolie R, Mannan RM, Ankenbauer RG, Welch SK. Cd163 expression confers susceptibility to porcine reproductive and respiratory syndrome viruses. *J Virol*. 2007;81:7371-7379
  41. Maidji E, Somsouk M, Rivera JM, Hunt PW, Stoddart CA. Replication of cmv in the gut of hiv-infected individuals and epithelial barrier dysfunction. *PLoS Pathog*. 2017;13:e1006202
  42. Vita S, Lichtner M, Marchetti G, Mascia C, Merlini E, Cicconi P, Vullo V, Viale P, Costantini A, D'Arminio Monforte A, Group fIFS. Brief report: Soluble cd163 in cmv-infected and cmv-uninfected subjects on virologically suppressive antiretroviral therapy in the icona cohort. *J Acquir Immune Defic Syndr*. 2017;74:347-352
  43. Foussat A, Bouchet-Delbos L, Berrebi D, Durand-Gasselini I, Coulomb-L'Hermine A, Krzysiek R, Galanaud P, Levy Y, Emilie D. Deregulation of the expression of the fractalkine/fractalkine receptor complex in hiv-1-infected patients. *Blood*. 2001;98:1678-1686
  44. Sacre K, Hunt PW, Hsue PY, Maidji E, Martin JN, Deeks SG, Autran B, McCune JM. A role for cytomegalovirus-specific cd4+cx3cr1+ t cells and cytomegalovirus-induced t-cell immunopathology in hiv-associated atherosclerosis. *AIDS*. 2012;26:805-814
  45. Lee M, Lee Y, Song J, Lee J, Chang SY. Tissue-specific role of cx. *Immune Netw*. 2018;18:e5
  46. McDermott DH, Halcox JP, Schenke WH, Waclawiw MA, Merrell MN, Epstein N, Quyyumi AA, Murphy PM. Association between polymorphism in the chemokine receptor cx3cr1 and coronary vascular endothelial dysfunction and atherosclerosis. *Circ Res*. 2001;89:401-407
  47. Moatti D, Faure S, Fumeron F, Amara MI-W, Seknadji P, McDermott DH, Debré P, Aumont MC, Murphy PM, de Prost D, Combadière C. Polymorphism in the fractalkine receptor cx3cr1 as a genetic risk factor for coronary artery disease. *Blood*. 2001;97:1925-1928
  48. Stolla M, Pelisek J, von Brühl ML, Schäfer A, Barocke V, Heider P, Lorenz M, Tirniceriu A, Steinhart A, Bauersachs J, Bray PF, Massberg S, Schulz C. Fractalkine is expressed in early and advanced atherosclerotic lesions and supports monocyte recruitment via cx3cr1. *PLoS One*. 2012;7:e43572

49. Combadière B, Faure S, Autran B, Debré P, Combadière C. The chemokine receptor cx3cr1 controls homing and anti-viral potencies of cd8 effector-memory t lymphocytes in hiv-infected patients. *AIDS*. 2003;17:1279-1290
50. Hoehl S, Berger A, Ciesek S, Rabenau HF. Thirty years of cmv seroprevalence-a longitudinal analysis in a german university hospital. *Eur J Clin Microbiol Infect Dis*. 2020;39:1095-1102
51. Ahn J, Barber GN. Sting signaling and host defense against microbial infection. *Exp Mol Med*. 2019;51:1-10
52. Zhong B, Yang Y, Li S, Wang YY, Li Y, Diao F, Lei C, He X, Zhang L, Tien P, Shu HB. The adaptor protein mita links virus-sensing receptors to irf3 transcription factor activation. *Immunity*. 2008;29:538-550
53. Ishikawa H, Barber GN. Sting is an endoplasmic reticulum adaptor that facilitates innate immune signalling. *Nature*. 2008;455:674-678
54. Yamamoto T, Kanuma T, Takahama S, Okamura T, Moriishi E, Ishii KJ, Terahara K, Yasutomi Y. Sting agonists activate latently infected cells and enhance siv-specific responses ex vivo in naturally siv controlled cynomolgus macaques. *Sci Rep*. 2019;9:5917
55. Casazza JP, Brenchley JM, Hill BJ, Ayana R, Ambrozak D, Roederer M, Douek DC, Betts MR, Koup RA. Autocrine production of beta-chemokines protects cmv-specific cd4 t cells from hiv infection. *PLoS Pathog*. 2009;5:e1000646

## Digital spatial profiling of coronary plaques from persons living with HIV reveals high levels of STING and CD163 in macrophage enriched regions

Celestine N. Wanjalla<sup>1,8</sup>, Liang Guo<sup>2</sup>, Daniela T. Fuller<sup>2</sup>, Mona Mashayekhi<sup>3</sup>, Samuel Bailin<sup>1</sup>, Curtis L. Gabriel<sup>4</sup>, Tecla Temu<sup>5</sup>, Jingjing Gong<sup>6</sup>, Yan Liang<sup>6</sup>, Renu Virmani<sup>2</sup>, Alope V. Finn<sup>2</sup>, Spyros A. Kalams<sup>1,9</sup>, Simon A. Mallal<sup>1,7,8</sup>, Jonathan J. Miner<sup>9</sup>, Joshua A. Beckman<sup>10</sup>, John R. Koethe<sup>1,8,12</sup>

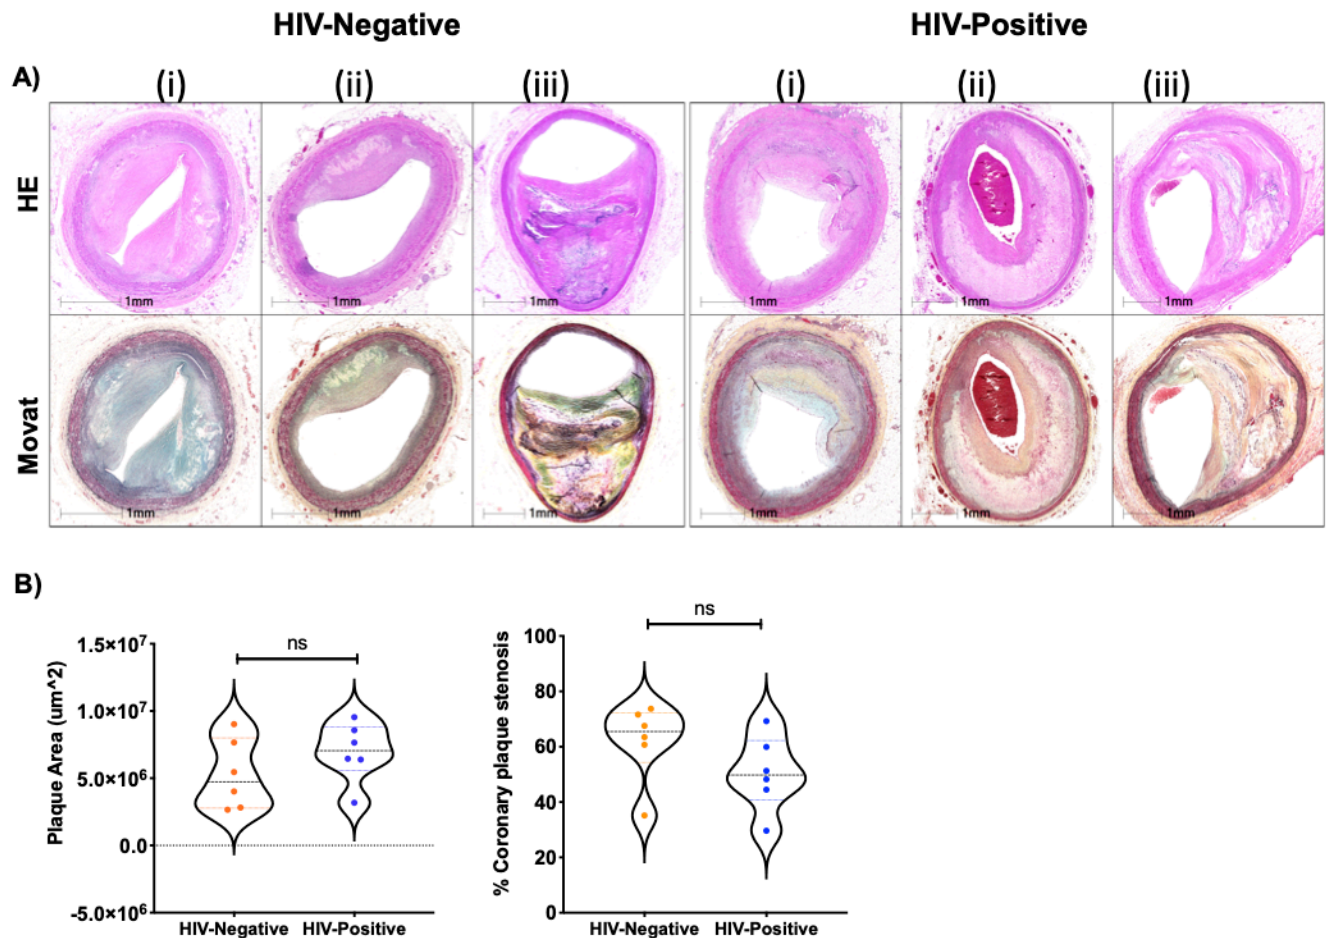

**Figure 1. Characterization of coronary plaques.** Representative coronary plaques from three HIV-positive and three HIV-negative individuals were stained with H&E and Movat stain (A). Plaque area ( $\mu\text{m}^2$ ) and % plaque stenosis were measured and calculated in 6 individuals per group (B). Statistical analysis, Mann-Whitney; *ns* not significant



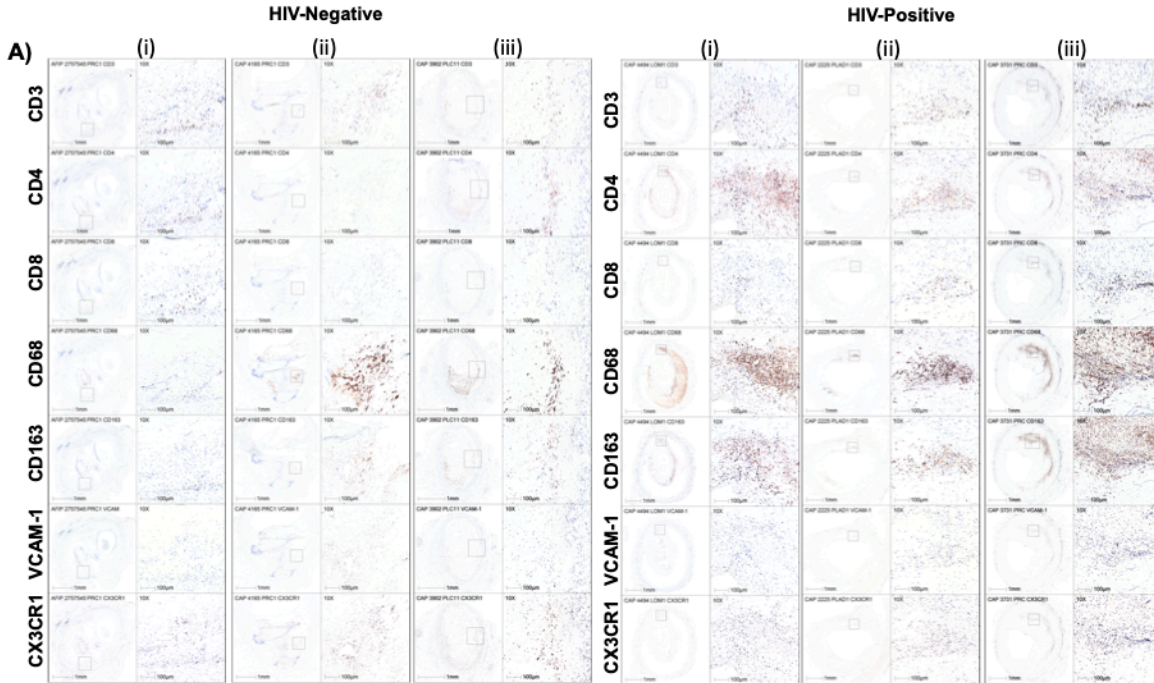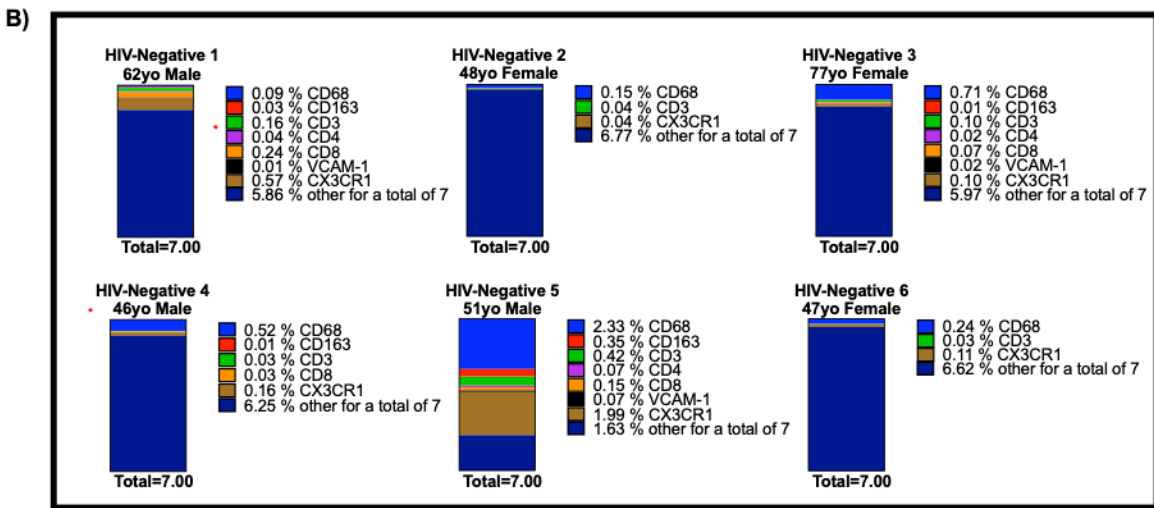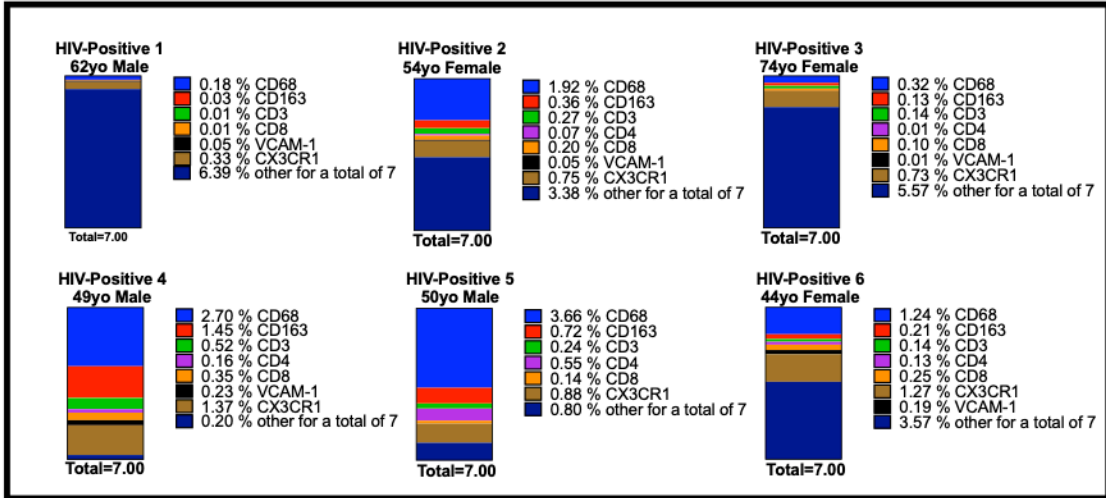

**Figure 2. Coronary plaque immune cell constituents in HIV-positive and HIV-negative persons.** IHC stains of CD3, CD4, CD8, CD68, CD163, VCAM-1 and CX3CR1 in three out of six representative coronary plaques from HIV-positive and negative deceased persons (A). The percentage of CD68<sup>+</sup>, CX3CR1<sup>+</sup>, CD8<sup>+</sup>, CD4<sup>+</sup>, VCAM-1<sup>+</sup> and CD163<sup>+</sup> were determined and displayed using a stacked bar chart showing additive percentage of immune cells/um<sup>2</sup> in each individual. The highest total percentage of cells was ~7%, which was used as the total in all individuals to allow for direct comparisons (B). Coronary plaques labeled HIV-Negative #5 and HIV-Positive #4 (marked by red \*) were selected for digital spatial profiling.

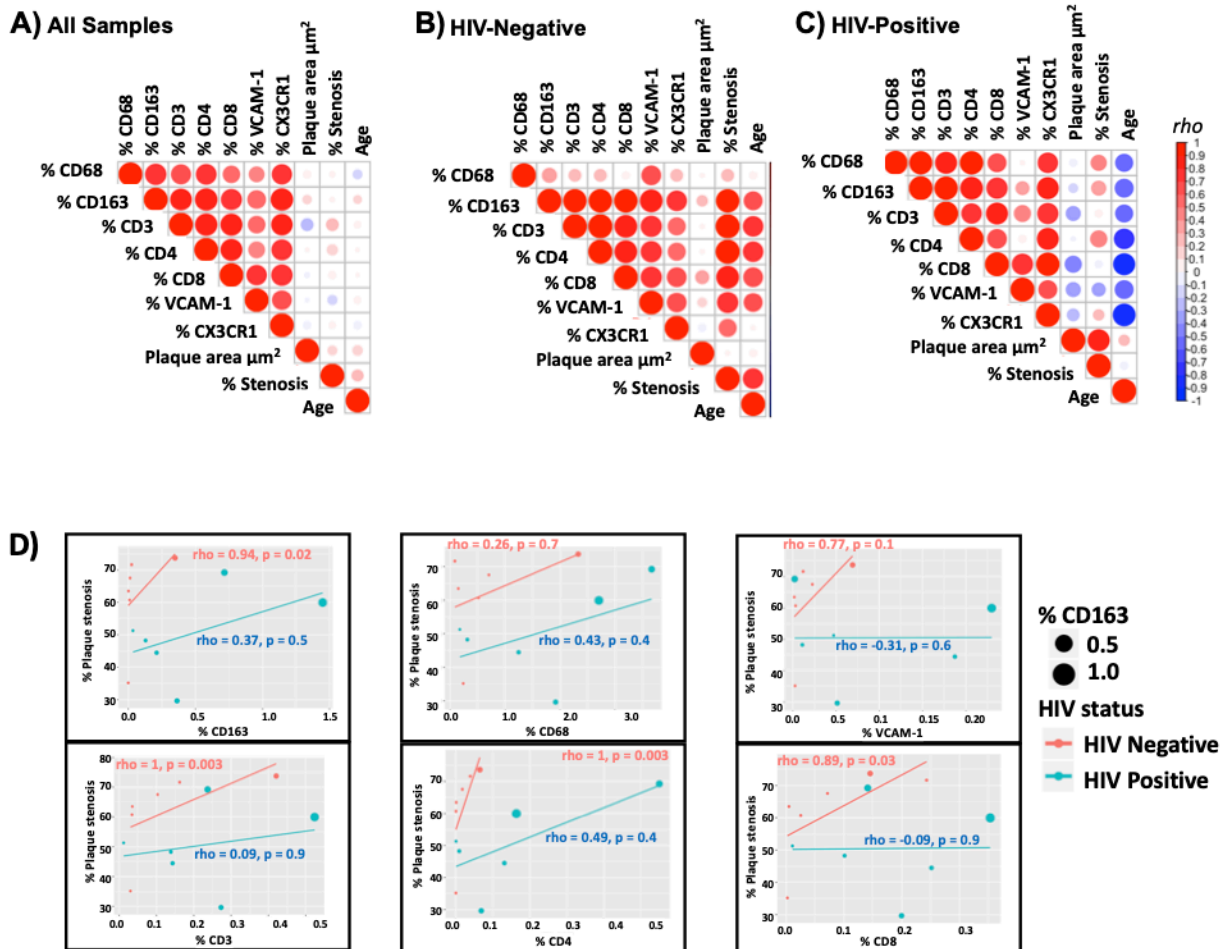

**Figure 3. There is a positive correlation between plaque stenosis and CD163, CD3, CD4 and CD8 in HIV-negative coronary samples and not HIV-positive.** Correlation matrices between immune cells in all samples (A), HIV-positive (B) and HIV-negative (C) were generated in r using the corrplot package. Spearman rank correlation analysis of plaque stenosis and each of the immune subsets was also done on r, the size of the dots represent the percentage of CD163<sup>+</sup> cells in that specific sample (D). Statistical analysis, spearman correlation analysis, P < 0.05 significant.

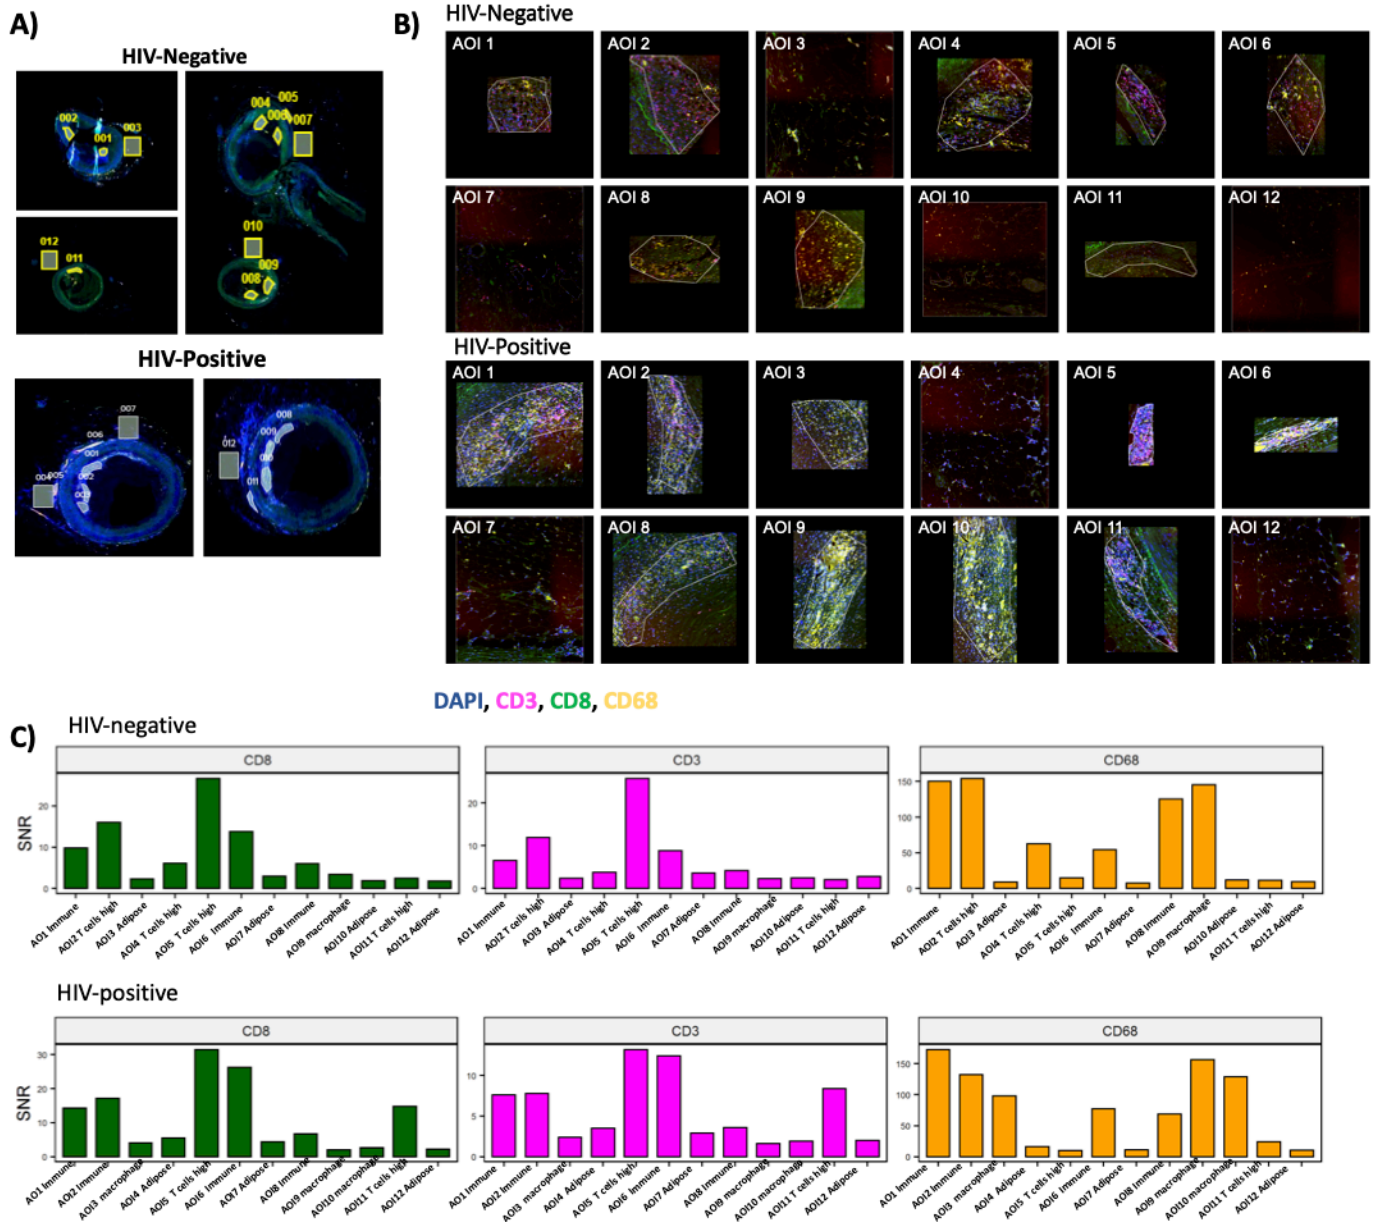

**Figure 4. Digital spatial profiling of immune-related proteins in coronary plaques from HIV-positive and HIV-negative individuals.** Twelve ROI per sample (HIV-positive and negative) were selected for analysis. Geometric regions of varying sizes were used to select regions of interest within the plaque, in the adventitia and perivascular adipose tissue. (A). Each sample was stained with anti-CD3 (pink), anti-CD8 (green) and anti-CD68 (yellow). SYTO 83 nuclear staining was included to visualize all cells. The twelve different regions selected per sample are designated as area of interest (AOI 1-12) are shown (B). Signal to noise ratio normalized barcode counts of the three fluorescently tagged markers across all 12-AOIs demonstrate heterogeneity of coronary plaques in both groups (C).

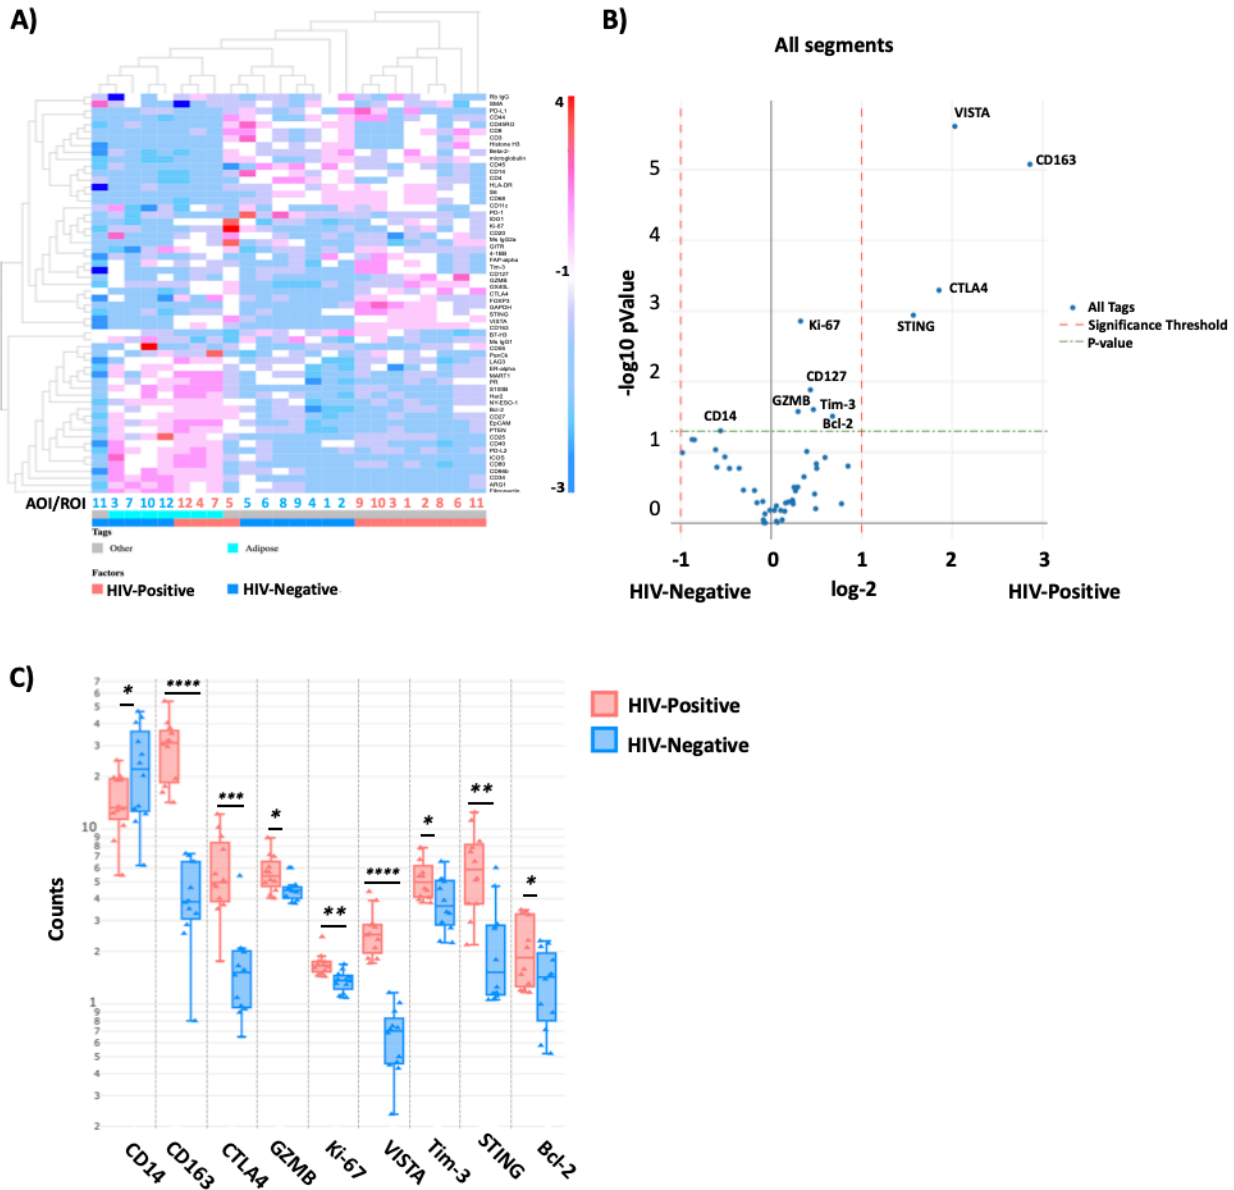

**Figure 5. Digital spatial imaging analysis shows clustering of adipose tissue segments independent of HIV-status.** A dendrogram grouping area of interest (AOI) segments that have similar protein expression (A). Differential protein expression of all segments by HIV-status (B). Box plots showing STING, VISTA, CD127, Bcl-3, Ki-67 and CD163, higher in HIV-positive and CD14, higher in HIV-negative AOI's (C). Significance determined by t-test, and BH correction  $p < 0.05$  significant.

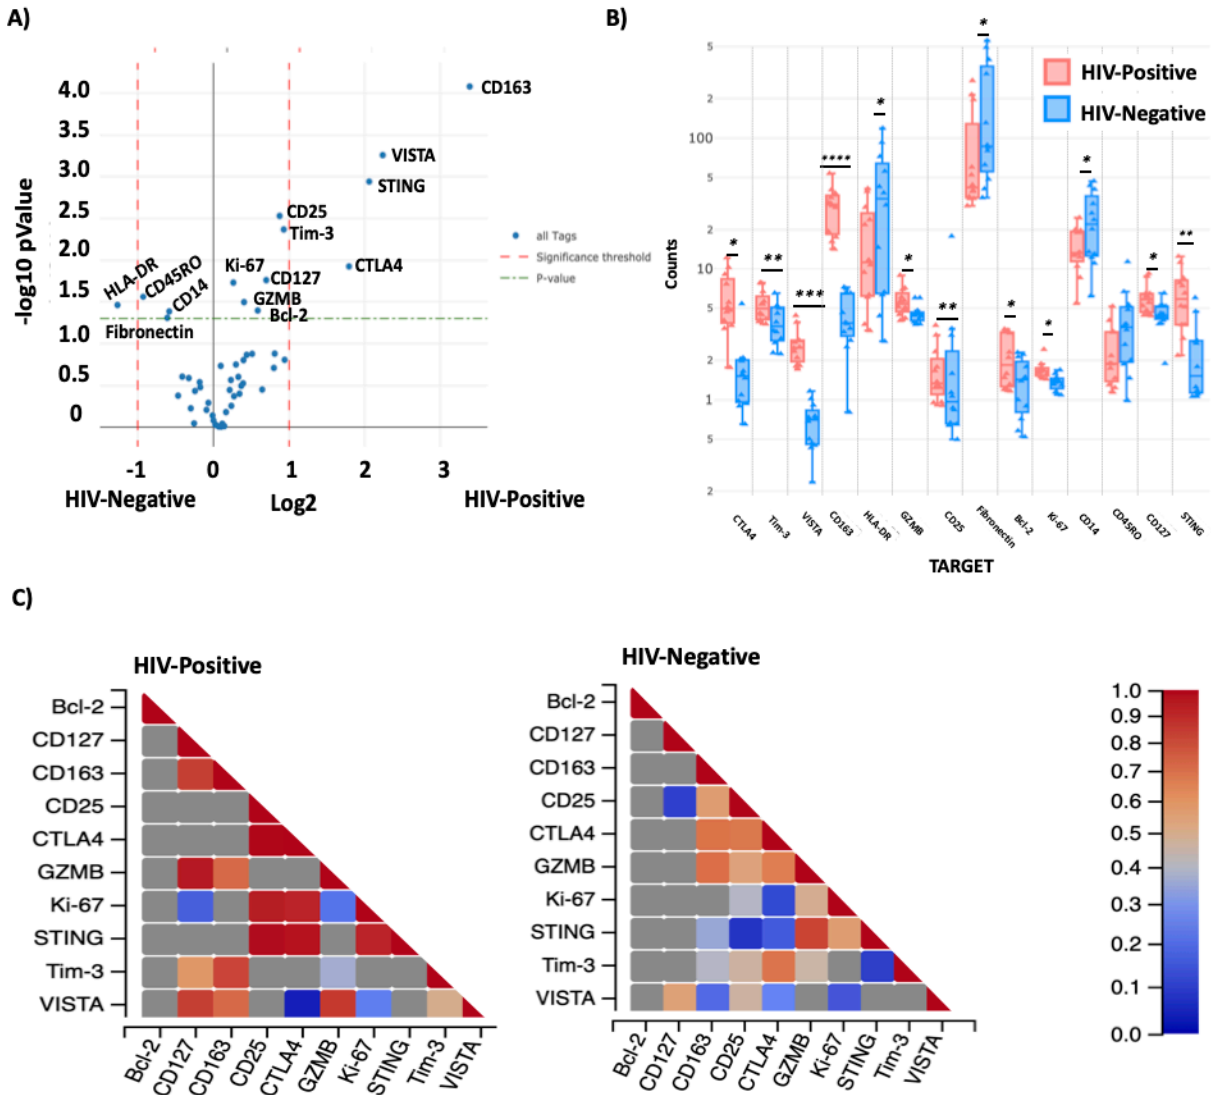

**Figure 6. STING, CD163 and VISTA protein expression levels are higher in HIV-positive coronary plaque AOI's.** Violin plot showing differential protein expression between HIV-positive and HIV-Negative AOI's within the plaque (A). Box plot showing the median counts of the proteins that were significantly higher in HIV-negative and positive samples (B). There is a positive correlation between STING protein expression and Ki-67 both HIV-positive and HIV-negative coronary plaque samples, and CD25, CTLA4 in the HIV-positive (C). Statistical analysis, t-test with BH correction, (green dashed line)  $p < 0.05$  and red dashed lines (fold change  $> 1$ ).

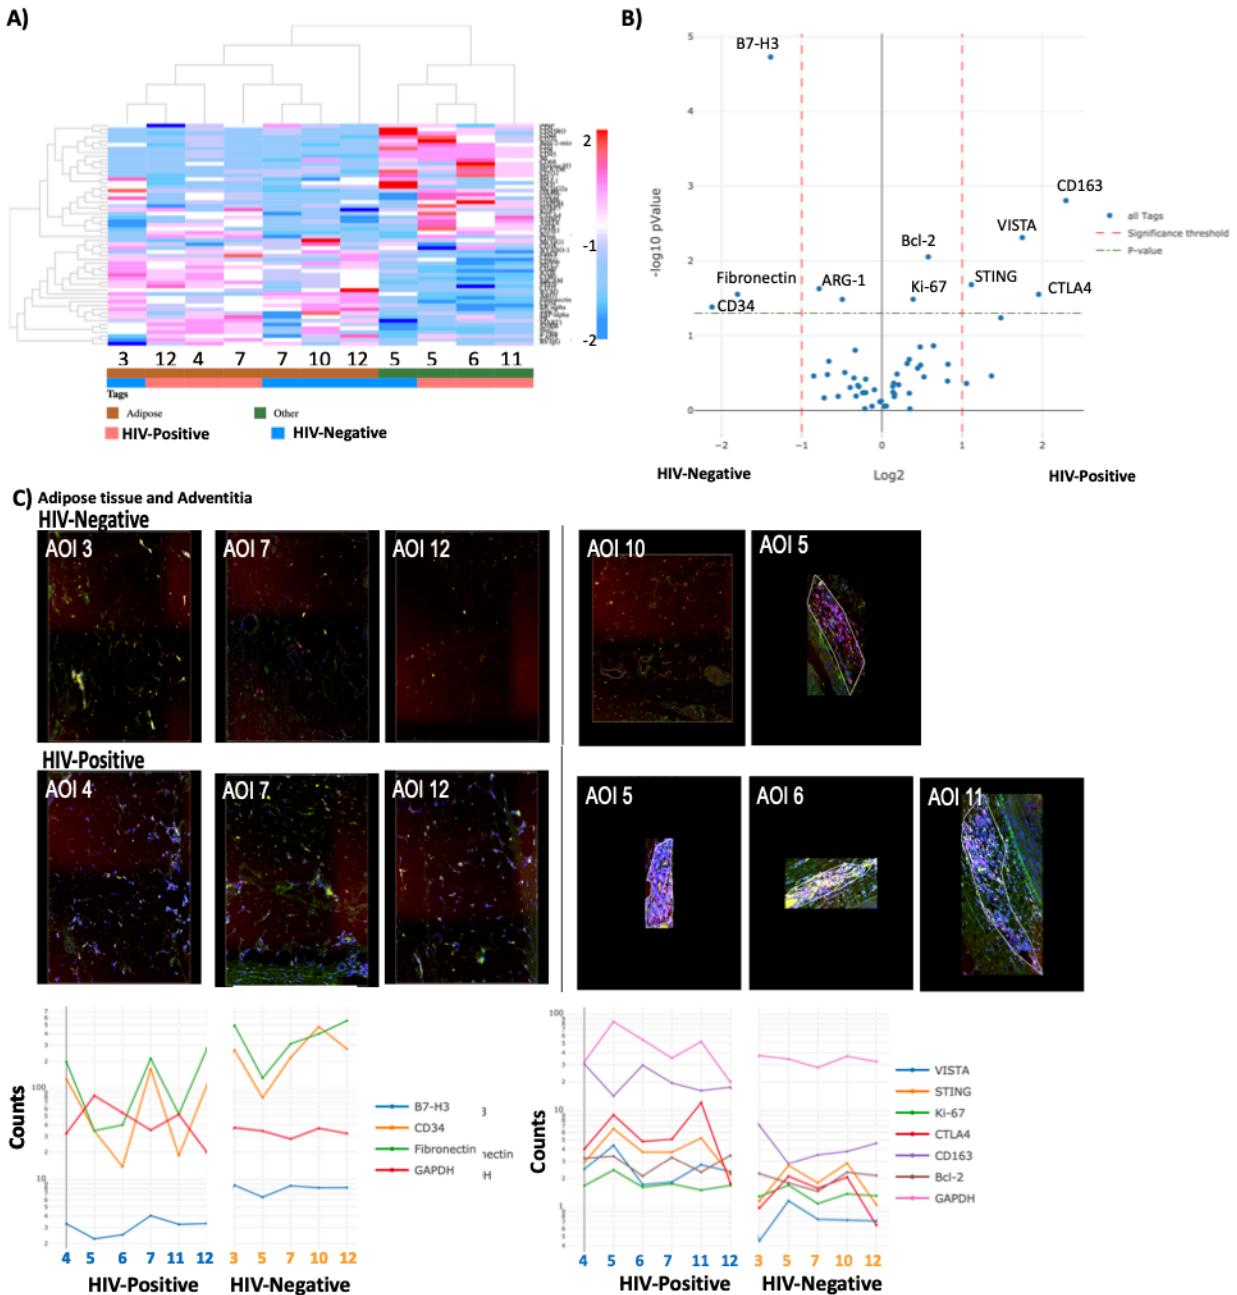

**Figure 7. CD163, CTLA4, STING and VISTA are highly expressed in external AOs in the HIV-positive coronary plaque sample.** Dendrogram with unsupervised clustering showing protein expression in HIV-positive and HIV-negative AOs (A). Differential gene expression of proteins in external AOs (adipose tissue and adventitia) by HIV-status (B). Trendlines and corresponding external images of the external AOs (C). Statistical analysis, t-test (green dashed line)  $p < 0.05$  and red dashed lines (fold change  $> 1$ ).

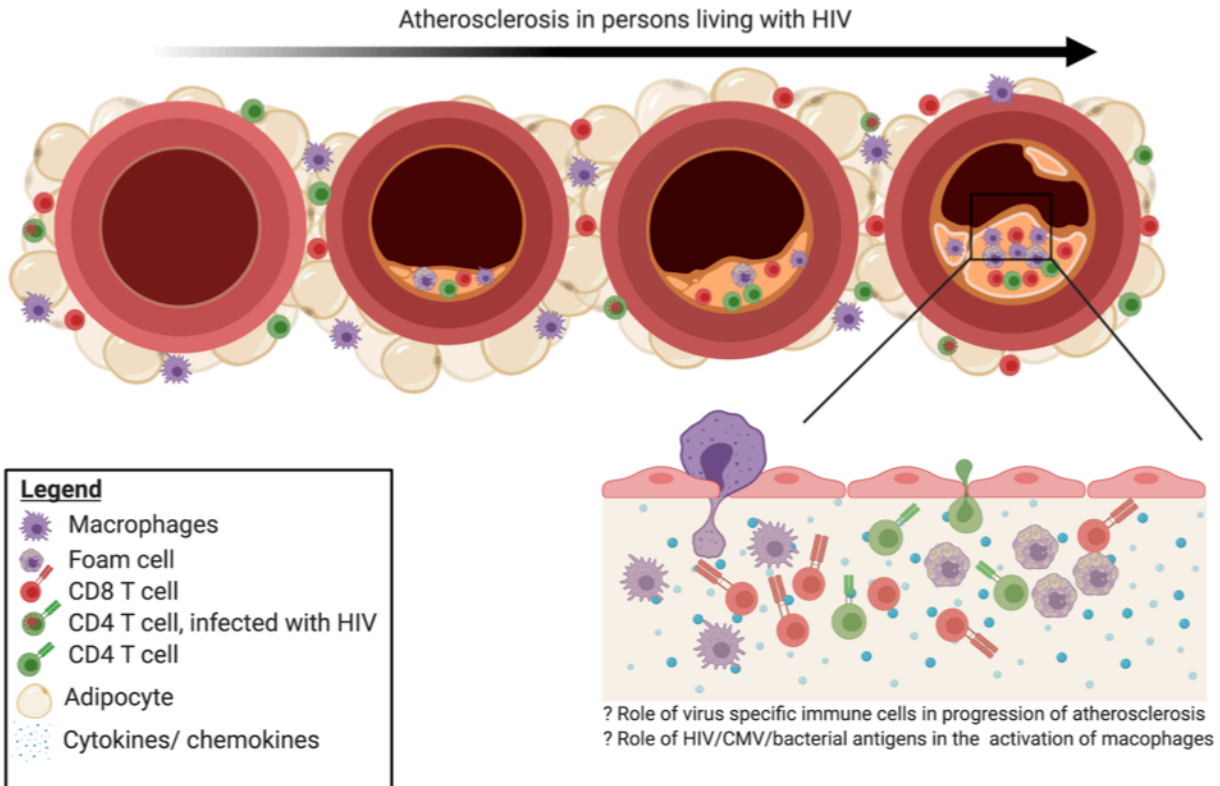

**Figure 8. Proposed model. Virus-specific immune responses are important in the progression of atherosclerosis in PLWH.** CD4<sup>+</sup> T cells with HIV DNA have been detected in adipose tissue of PLWH.<sup>28, 29, 44</sup> CMV transcripts have also been reported in adipose tissue.<sup>45</sup> In this paper, we show that PLWH had higher proportions of CX3CR1<sup>+</sup> CD4<sup>+</sup> T cells in the perivascular adipose tissue and coronary plaque. A large proportion of CMV-specific CD4<sup>+</sup> T cells are CX3CR1<sup>+</sup>.<sup>22, 36, 46, 47</sup> This suggests that virus-specific immune cells are present within early atheromas. Higher expression of STING, CD25, Bcl-2, Ki-67, CD163 and GZMB suggests higher levels of activation in the samples from PLWH compared to the HIV-negative samples. Future studies looking at coronary plaques at different stages of atheroma will be evaluated to answer the question whether low level viral replication (HIV and CMV) can be detected in macrophages/ T cells in coronary plaques of PLWH on ART and whether the magnitude of viral transcripts correlate with the level of immune cell infiltration or activation.
